# Supplementary material for: Ellagic acid ameliorates AKT-driven hepatic steatosis in mice by suppressing de novo lipogenesis via the AKT/SREBP-1/FASN pathway
Source: Royal Society of Chemistry journal article supplement (doi:10.1039/c9fo00284g), 2019-01-01
Supplement: c9fo00284g1.pdf [file c9fo00284g1.pdf]

## Supplementary materials

### Ellagic acid ameliorates AKT-driven hepatic steatosis in mice by suppressing *de novo* lipogenesis via the AKT/SREBP-1/FASN pathway

**\*Corresponding author:** Zhenpeng Qiu, M.D., College of Pharmacy, Hubei University of Chinese Medicine, No. 1, West Huangjiahu Road, Wuhan 430065, People's Republic of China; e-mail address: [whuqq@hotmail.com](mailto:whuqq@hotmail.com).

**Supplementary Figure 1.** The effect of ellagic acid (EA) on the liver weight of AKT-injected mice. Mean  $\pm$  S.D.,  $n = 3$ .  $##P < 0.001$  vs the WT group;  $*P < 0.05$ ,  $**P < 0.01$  vs the AKT-injected group. EA-L and EA-H represent intragastric administration of ellagic acid at low (150 mg) and high (300 mg) doses, respectively.

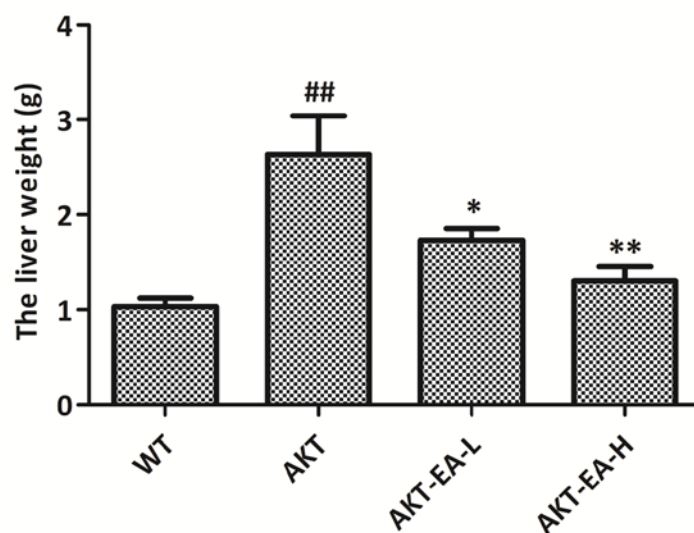

**Supplementary Figure 2.** The effects of ellagic acid (EA) on cell viability of HepG2

(A) and SMMC-7721 (B) cell lines.

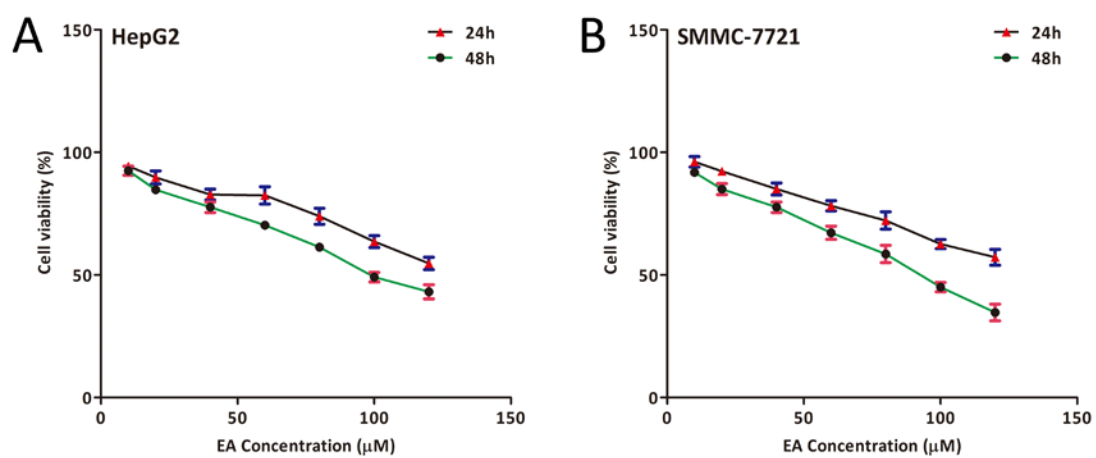

**Supplementary Figure 3.** Ellagic acid (EA) inhibits the protein expression of PCNA in livers of the AKT-injected mice. Three samples from each group were employed for a Western blot assay, and representative bands are shown in (A). (B) Histograms show the protein expression of PCNA levels quantified by the Western blot optical analysis shown in (A). Housekeeping gene  $\beta$ -actin was used as an internal reference. Quantitative data denote the mean  $\pm$  S.D. of values derived from the Western blot density analysis,  $n = 3$ . #### $P < 0.001$  versus the WT group; \* $P < 0.05$ , \*\* $P < 0.01$  versus the AKT group. EA-L and EA-H represent intragastric administration of ellagic acid at low (150 mg) and high (300 mg) doses, respectively.

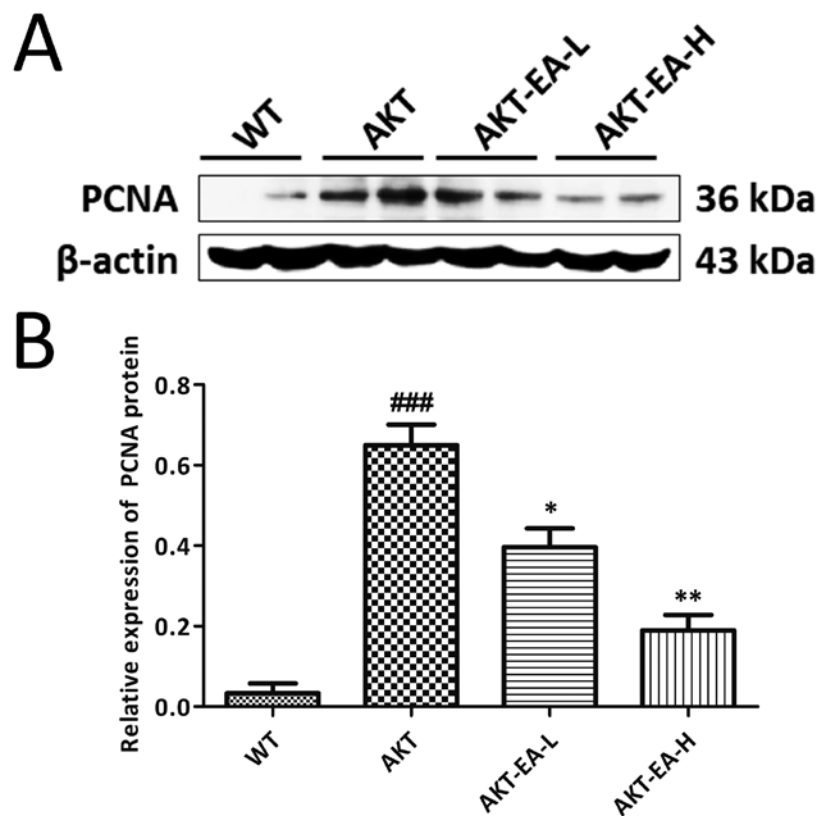

**Supplementary Table 1.** List of the primary antibodies used for Western blot analysis (WB).

| Protein              | Antibody (and catalog number)  | Application |
|----------------------|--------------------------------|-------------|
| Phospho-AKT (Thr308) | Rabbit monoclonal (13038)      | WB †        |
| Total-AKT            | Rabbit monoclonal (4691)       | WB †        |
| Phospho-RPS6         | Rabbit monoclonal (4858)       | WB †        |
| RPS6                 | Rabbit polyclonal (14823-1-AP) | WB #        |
| SREBP-1              | Rabbit polyclonal (GB11524)    | WB *        |
| FASN                 | Rabbit monoclonal (3180)       | WB, IHC †   |
| ACC                  | Rabbit monoclonal (3676)       | WB, IHC †   |
| PCNA                 | Mouse monoclonal (2586)        | WB †        |
| β-actin              | Mouse monoclonal (A1978)       | WB ^        |

† Provided by Cell Signaling Technology Inc. (Danvers, MA).

# Provided by Proteintech (Wuhan, China).

\* Provided by Servicebio (Wuhan, China).

^ Provided by Abcam (Cambridge, MA).

**Supplementary Table 2.** Sequences of primers used in quantitative real-time PCR

(qPCR)

| Gene           | Sequences (5' to 3')             | Length (bp) |
|----------------|----------------------------------|-------------|
| $\beta$ -actin | Forward: CGTTGACATCCGTAAAGACCTC  | 110         |
|                | Reverse: TAGGAGCCAGGGCAGTAATCT   |             |
| SREBP-1        | Forward: TGACCCGGCTATTCCGTGA     | 61          |
|                | Reverse: CTGGGCTGAGCAATACAGTTC   |             |
| FASN           | Forward: CCAAGCAGGCACACACAA      | 132         |
|                | Reverse: CACTCACACCCACCCAGA      |             |
| ACC            | Forward: GATGAACCATCTCCGTTGGC    | 65          |
|                | Reverse: GACCCAATTATGAATCGGGAGTG |             |
